# Supplementary material for: Identification of a Proanthocyanidin from Litchi Chinensis Sonn. Root with Anti-Tyrosinase and Antioxidant Activity
Source: MDPI journal article supplement (doi:10.3390/biom10091347), 2020-09-21
Supplement: s1 [file s1]

# Supplementary material

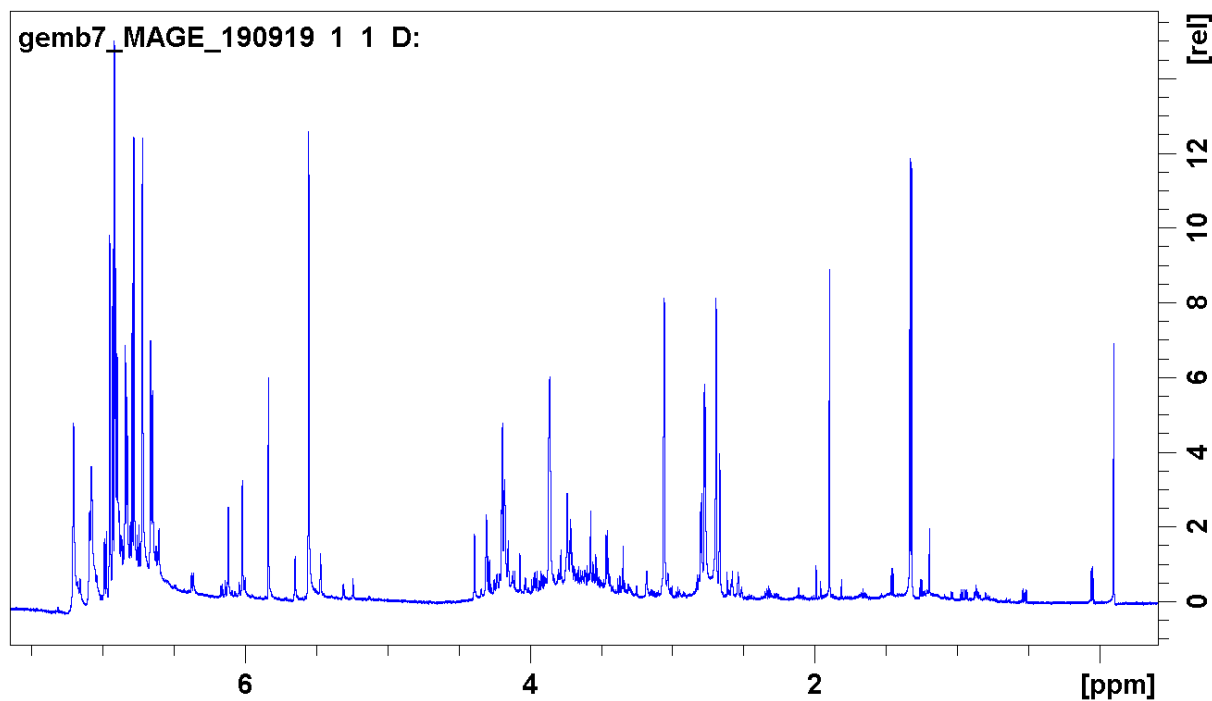

Supplementary figure 1 : 1D  $^1\text{H}$  NMR spectrum of the isolated compound.

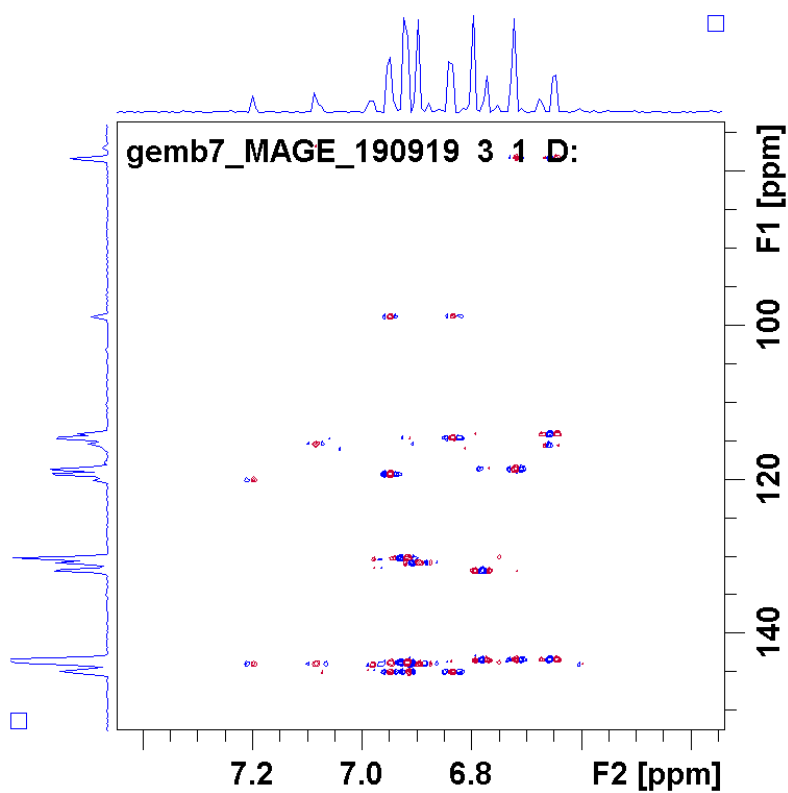

Supplementary figure 2: 2D HMBC NMR spectrum of the isolated compound.

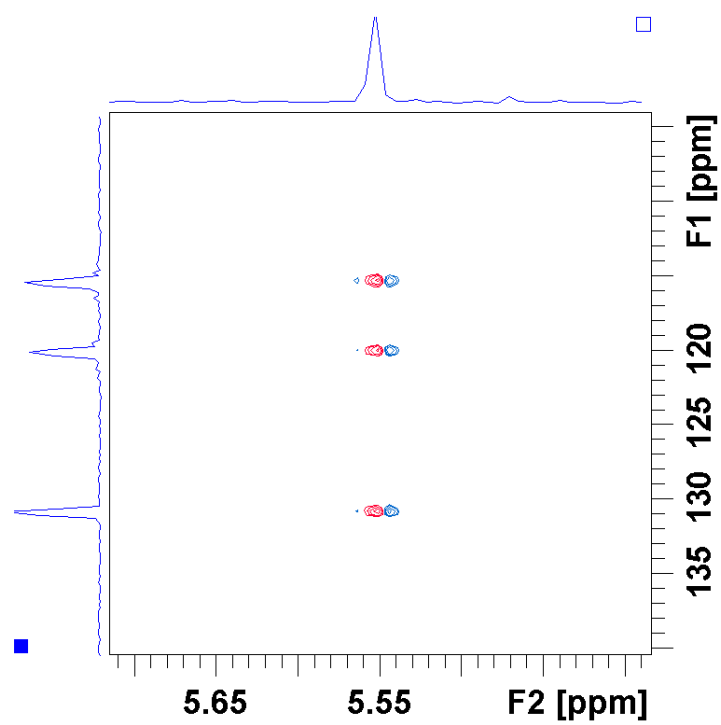

Supplementary figure 3 : 2D HMBC NMR spectrum of the isolated compound.

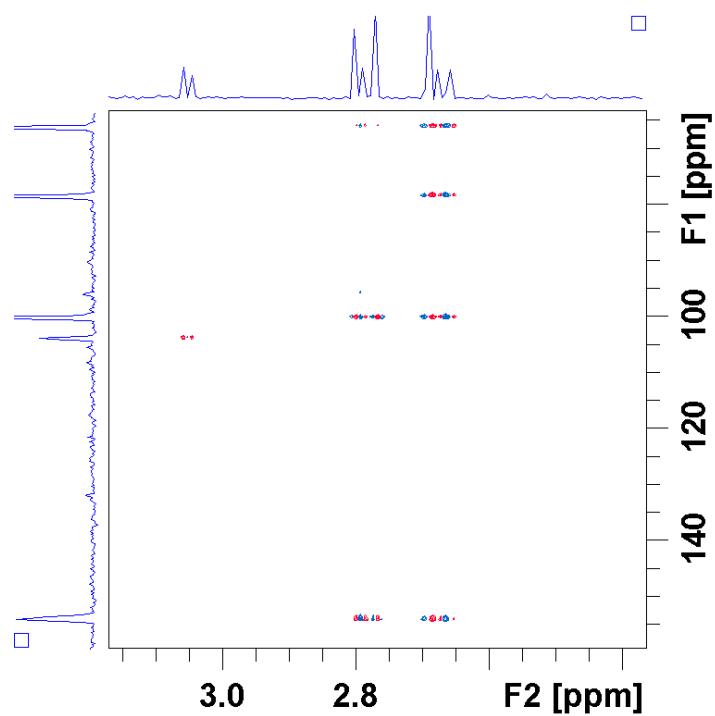

Supplementary figure 4 : 2D HMBC NMR spectrum of the isolated compound.

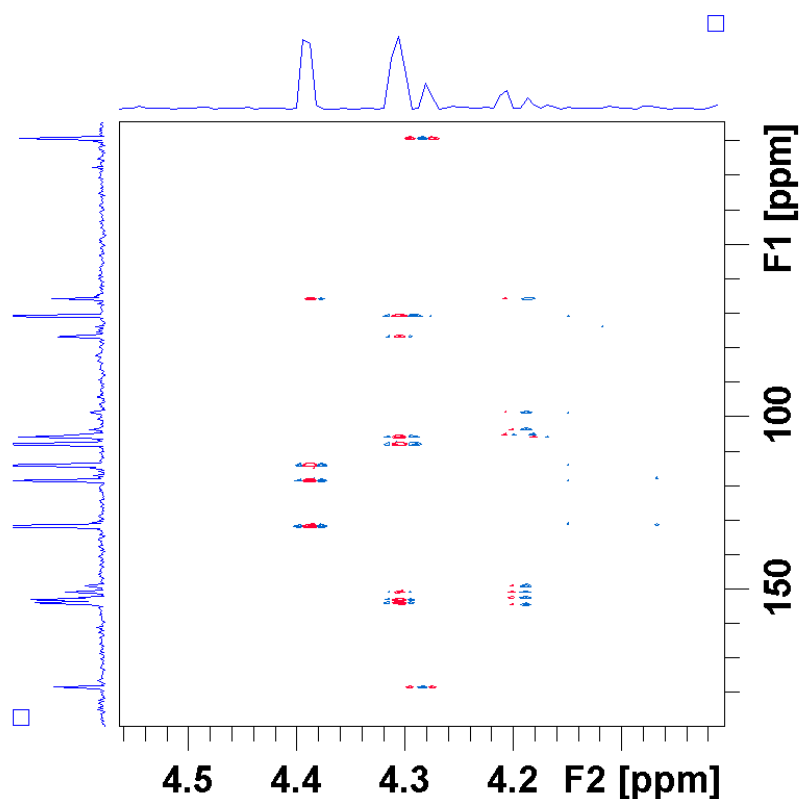

Supplementary figure 5 : 2D HMBC NMR spectrum of the isolated compound.

| Line | Colour | $^1\text{H}$ chemical shift (ppm) | $^2J_{\text{CH}}$ and $^3J_{\text{CH}}$ coupled $^{13}\text{C}$ chemical shift (ppm) |
|------|--------|-----------------------------------|--------------------------------------------------------------------------------------|
| 1    | Green  | 7.2                               | 144, 120, 77                                                                         |
| 2    | Green  | 7.1                               | 144, 116, 77                                                                         |
| 3    | Yellow | 7.0                               | 144, 119, 99                                                                         |
| 4    | Blue   | 6.9                               | 144, 131                                                                             |
| 5    | Blue   | 6.9                               | 144, 131                                                                             |
| 6    | Blue   | 6.8                               | 144, 131                                                                             |
| 7    | Blue   | 6.8                               | 144, 131                                                                             |
| 8    | Yellow | 6.8                               | 144, 115, 99                                                                         |
| 9    | Green  | 6.7                               | 144, 119, 78                                                                         |
| 10   | Green  | 6.6                               | 144, 115, 78                                                                         |
| 11   | Brown  | 5.8                               | 105*                                                                                 |
| 12   | Grey   | 5.6                               | 131, 120, 115                                                                        |
| 13   | Red    | 4.4                               | 131, 119, 113, 66                                                                    |
| 14   | Purple | 4.3                               | 154, 153, 151, 108, 106, 77, 71                                                      |
| 15   | Red    | 4.2                               | 149, 99, 66                                                                          |
| 16   | Red    | 3.9                               | 100, 78                                                                              |
| 17   | Red    | 3.1                               | 104                                                                                  |
| 18   | Purple | 2.8                               | 154, 100, 66                                                                         |
| 19   | Purple | 2.7                               | 154, 100, 78, 66                                                                     |

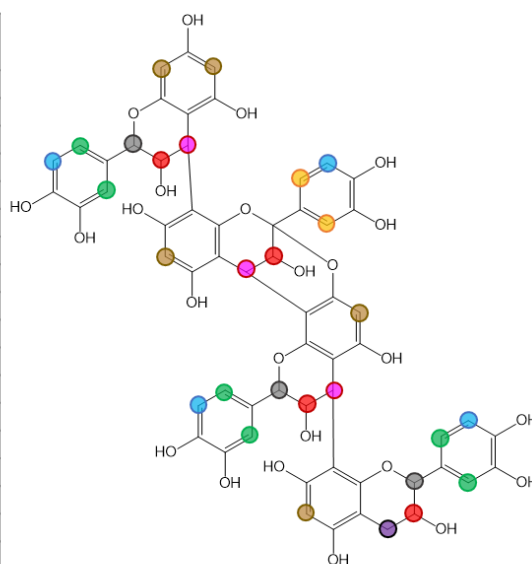

Supplementary figure 6: allocation of 2D HMBC NMR signals of the isolated compound.

Allocation colour indicates the position where the corresponding  $^1\text{H}$  is attached to the structure. Chemical shifts were rounded leading to identical HMBC signals in some cases. \*: this proton signal is perfectly visible in the 1D  $^1\text{H}$  NMR spectrum and can be unambiguously attributed to an aromatic structure, however no corresponding C-H signal can be observed in 2D HSQC NMR spectrum. In HMBC, a very weak signal is observed.
